# Supplementary material for: A Ni(OH)2 nanosheet array modified with Fe–phytate complex layer as a corrosion resistant catalyst for seawater electrolysis at ampere-level current density
Source: Royal Society of Chemistry journal article supplement (doi:10.1039/d4gc04713c), 2024-11-20
Supplement: d4gc04713c1.pdf [file d4gc04713c1.pdf]

## **Ni(OH)<sub>2</sub> nanosheet array modified with Fe-phytate complex layer as corrosion resistant catalyst for seawater electrolysis at ampere- level current density**

Yanyan Song,<sup>a,b</sup> Wenjie Shi,<sup>a</sup> Nini Li,<sup>a</sup> Qingyu Li,<sup>a</sup> Xi-ao Wang,<sup>a</sup> Xiaoyan Zhang,<sup>\*a</sup>  
Minghua Huang<sup>\*b</sup> and Lixue Zhang<sup>\*a,c</sup>

*<sup>a</sup>College of Chemistry and Chemical Engineering, Collaborative Innovation Center for  
Hydrogen Energy Key Materials and Technologies of Shandong Province, Qingdao  
University, Qingdao 266071, P. R. China*

*<sup>b</sup>School of Materials Science and Engineering, Ocean University of China, Qingdao,  
266100, P. R. China*

*<sup>c</sup>School of Petroleum and Chemical Engineering, Dongying Vocational Institute,  
Dongying 257091, P. R. China*

\*Corresponding authors: xyzhang@qdu.edu.cn (X. Zhang),  
huangminghua@ouc.edu.cn (M. Huang), zhanglx@qdu.edu.cn (L. Zhang).

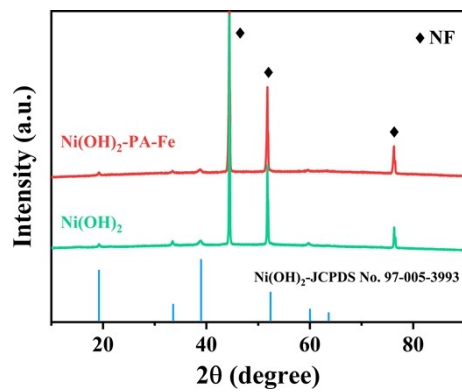

**Fig. S1.** XRD patterns of Ni(OH)<sub>2</sub> and Ni(OH)<sub>2</sub>-PA-Fe.

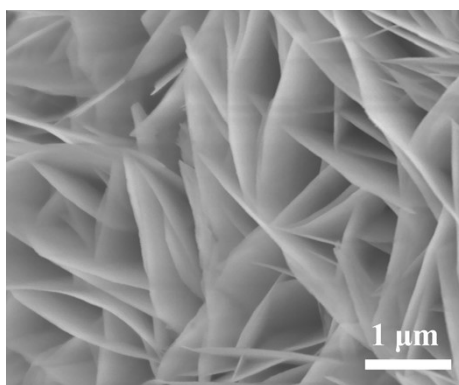

**Fig. S2.** SEM image of Ni(OH)<sub>2</sub>.

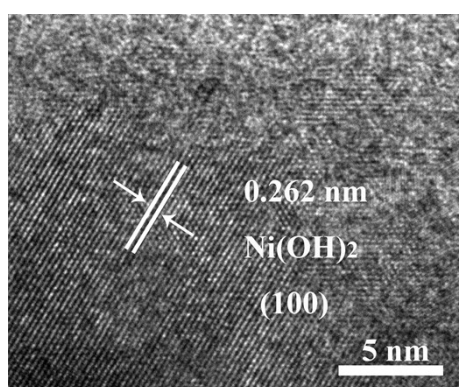

**Fig. S3.** HRTEM image of Ni(OH)<sub>2</sub>.

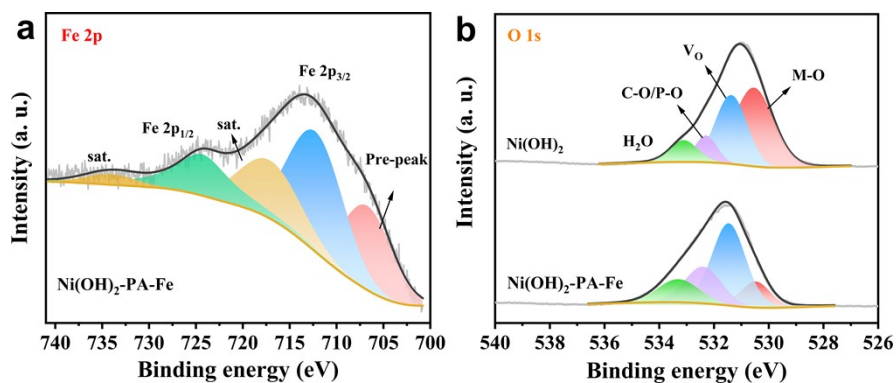

**Fig. S4.** The high-resolution XPS spectra of Ni(OH)<sub>2</sub>-PA-Fe in (a) Fe 2p and (b) O 1s regions.

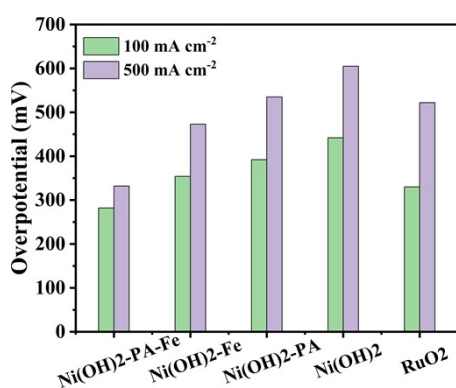

**Fig. S5.** The overpotentials required to achieve current densities of 100 and 500 mA cm<sup>-2</sup> for the various samples in 1 M KOH.

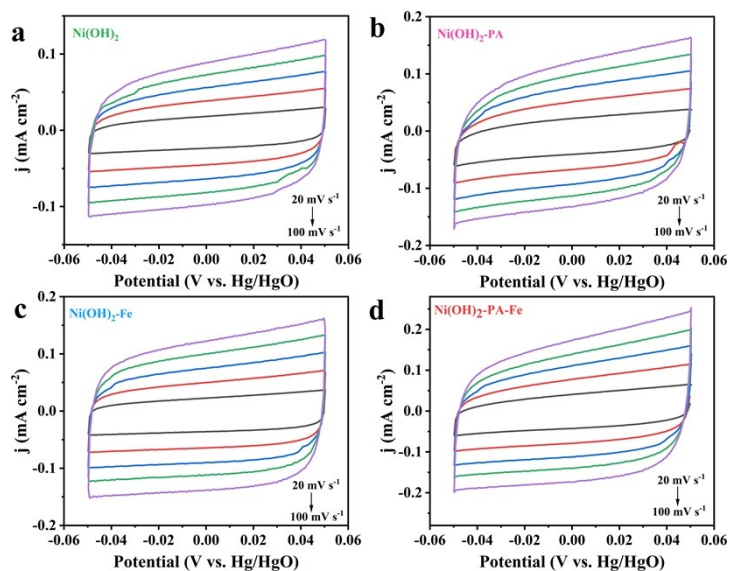

**Fig. S6.** CVs of (a) Ni(OH)<sub>2</sub>, (b) Ni(OH)<sub>2</sub>-PA, (c) Ni(OH)<sub>2</sub>-Fe, and (d) Ni(OH)<sub>2</sub>-PA-Fe at different scan rates of 20, 40, 60, 80 and 100 mV S<sup>-1</sup> in 1.0 M KOH.

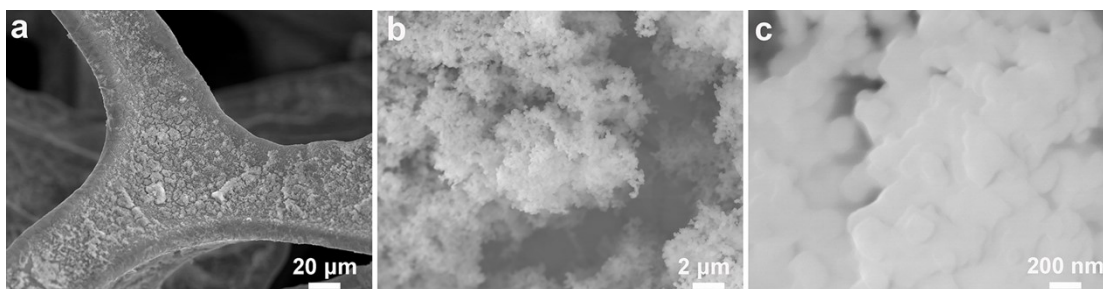

**Fig. S7.** SEM images at different magnifications of NF-PA-Fe.

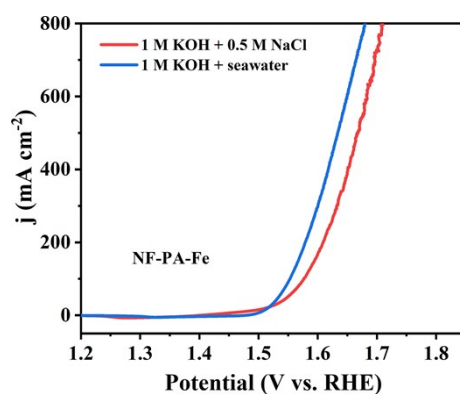

**Fig. S8.** Polarization curves for NF-PA-Fe electrode tested in different electrolytes.

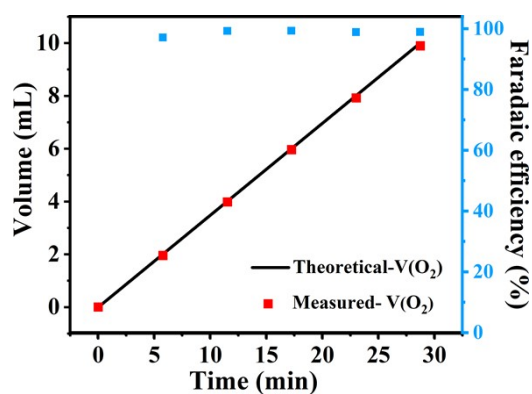

**Fig. S9.** Comparison between the amount of collected and theoretical gaseous products for OER at a constant current density of  $200 \text{ mA cm}^{-2}$  in 1 M KOH + seawater.

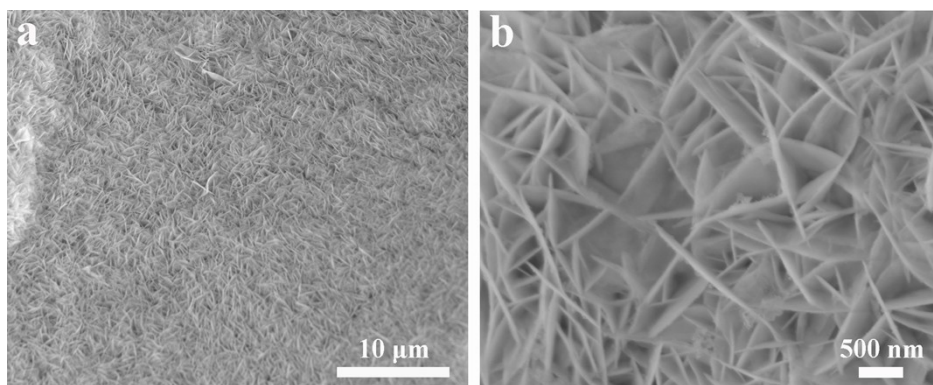

**Fig. S10.** (a, b) SEM images of Ni(OH)<sub>2</sub>-PA-Fe after OER test in 1.0 M KOH + seawater.

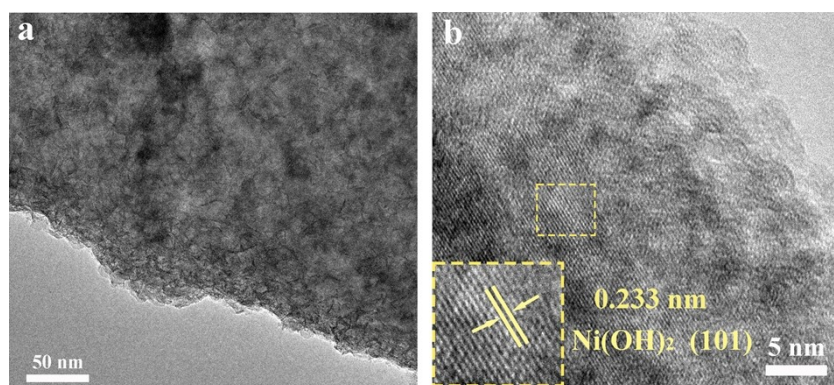

**Fig. S11.** (a) TEM image and (b) HRTEM of Ni(OH)<sub>2</sub>-PA-Fe after OER test in 1.0 M KOH + seawater.

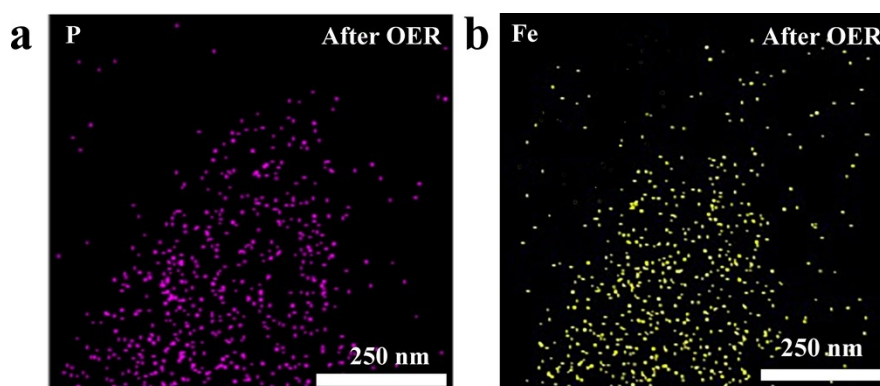

**Fig. S12.** TEM elemental mapping images of (a) P element and (b) Fe element in Ni(OH)<sub>2</sub>-PA-Fe catalyst after OER.

**Table S1.** Equivalent circuit fitting parameters of EIS curves for OER on Ni(OH)<sub>2</sub>-PA-Fe, Ni(OH)<sub>2</sub>-Fe, Ni(OH)<sub>2</sub>-PA and Ni(OH)<sub>2</sub>.

| Catalyst            | Ni(OH) <sub>2</sub> -PA-Fe | Ni(OH) <sub>2</sub> -Fe | Ni(OH) <sub>2</sub> -PA | Ni(OH) <sub>2</sub> |
|---------------------|----------------------------|-------------------------|-------------------------|---------------------|
| R <sub>s</sub> (Ω)  | 1.60                       | 1.60                    | 1.80                    | 1.70                |
| R <sub>ct</sub> (Ω) | 2.72                       | 23.7                    | 50.3                    | 75.2                |

**Table S2.** Comparison of the OER performance in alkaline condition of Ni(OH)<sub>2</sub>-PA-Fe and other reported catalysts.

| Catalysts                           | Electrolyte          | $\eta_{100}$<br>(mV) | Stability (h)                     | References                                                         |
|-------------------------------------|----------------------|----------------------|-----------------------------------|--------------------------------------------------------------------|
| Ni(OH) <sub>2</sub> -PA-Fe          | 1 M KOH + seawater   | 320                  | $j_{1000}=1200$                   | <b>This work</b>                                                   |
| Ni <sub>2</sub> P-Fe <sub>2</sub> P | 1 M KOH + seawater   | 305                  | $j_{500}=38$                      | <i>Adv. Funct. Mater.</i> , 2021, <b>31</b> , 2006484              |
| B-Co <sub>2</sub> Fe LDH            | 1 M KOH + seawater   | 310                  | $j_{500}=100$                     | <i>Nano Energy</i> , 2021, <b>83</b> , 105838                      |
| NiIr-LDH                            | 1 M KOH + seawater   | 315                  | $j_{500}=650$                     | <i>J. Am. Chem. Soc.</i> , 2022, <b>144</b> , 9254-9263            |
| Ni <sub>3</sub> FeN@C/NF            | 1 M KOH + seawater   | 314                  | $j_{500}=100$                     | <i>J. Mater. Chem. A</i> , 2021, <b>9</b> , 13562–13569            |
| NiMoN@NiFeN                         | 1 M KOH + seawater   | 307                  | $j_{500}=100$                     | <i>Nat. Commun.</i> , 2019, <b>10</b> , 5106                       |
| NiCoS/NF                            | 1 M KOH + seawater   | 360                  | $j_{100}=100$                     | <i>Appl. Catal. B- Environ.</i> , 2021, <b>291</b> , 120071        |
| NiCoHPi@Ni <sub>3</sub> N/NF        | 1 M KOH + seawater   | 396                  | -/-                               | <i>ACS Appl. Mater. Interfaces</i> , 2022, <b>14</b> , 22061–22070 |
| MoO <sub>3</sub> @CoO/CC            | 1 M KOH + seawater   | 404                  | $j_{600}=1000$<br>(Real seawater) | <i>Nature Commun.</i> , 2024, <b>15</b> , 2481                     |
| NiFeB <sub>x</sub> alloy            | 1 M KOH + 0.5 M NaCl | 328                  | $j_{500}=100$                     | <i>Adv. Funct. Mater.</i> , 2021, <b>31</b> , 2101820              |
| NiFe-PBA-gel-cal                    | 1 M KOH + 0.5 M NaCl | 329                  | $j_{500}=100$                     | <i>Nano Energy</i> , 2021, <b>83</b> , 105838                      |
| NiCr-LDH                            | 1 M KOH              | 319                  | $j_{100}=30$                      | <i>Nanoscale</i> , 2018, <b>10</b> , 19484                         |
| NiFe-LDH NSs                        | 1 M KOH              | $\eta_{30}=370$      | $j_{30}=8$                        | <i>Nano Research</i> , 2018, <b>11</b> , 1883                      |
